# Supplementary material for: Effect of Methyl Jasmonate on the Growth and Biosynthesis of C13- and C14-Hydroxylated Taxoids in the Cell Culture of Yew (Taxus wallichiana Zucc.) of Different Ages
Source: MDPI journal article supplement (doi:10.3390/biom13060969), 2023-06-09
Supplement: s1 [file s1]

## Supplementary Materials

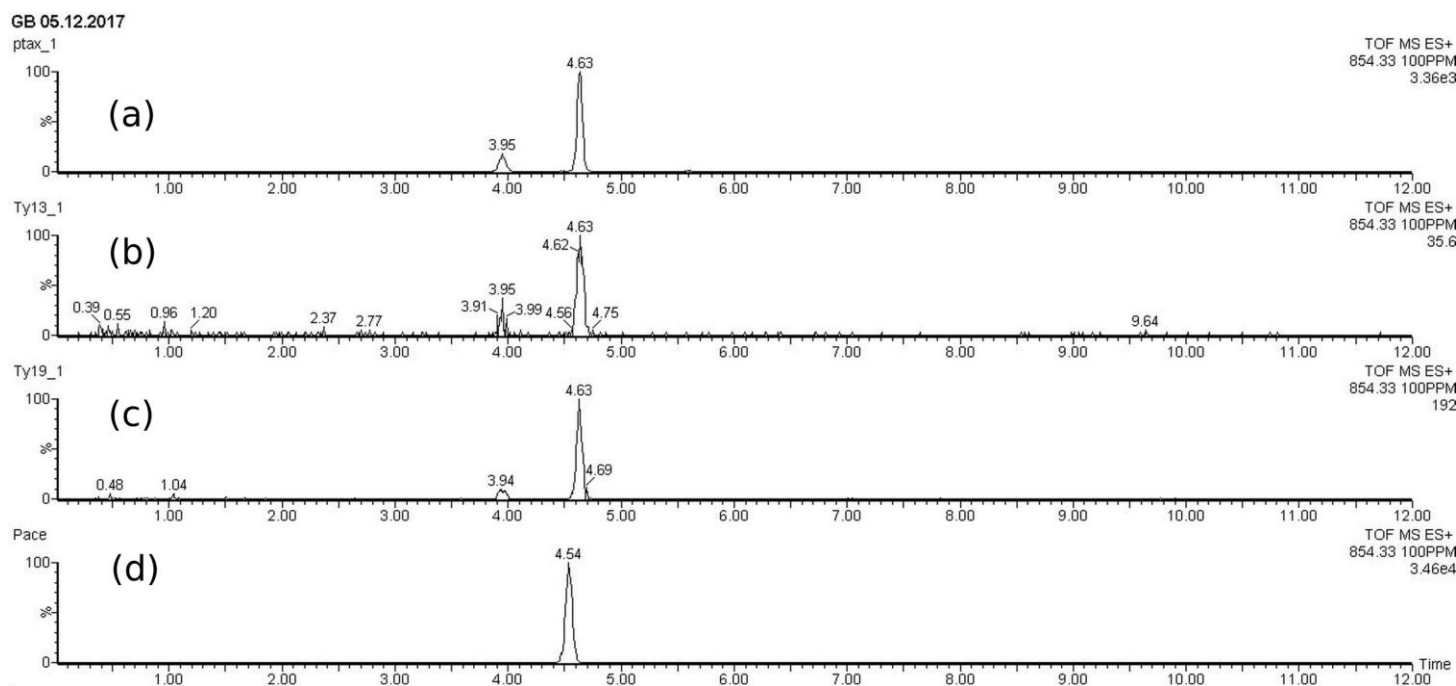

**Fig. S1.** UPLC-ESI-MS chromatograms (extracted ion chromatograms for  $m/z$  854.3 corresponding to  $[M+H]^+$  for paclitaxel) of methanolic extracts from biomass of *Taxus wallichiana* suspension cell culture and solutions of standard samples of paclitaxel: **(a)** – sample of paclitaxel isolated from the bark of *T. cuspidata*; **(b)** – methanolic extract from biomass of *T. wallichiana* «young» suspension cell culture, flasks, 28 days, control without elicitation; **(c)** – methanolic extract from biomass of *T. wallichiana* «young» cell suspension culture, flasks, day 28, 7 days after MeJ elicitation (final concentration 100  $\mu$ M); **(d)** – paclitaxel standard sample purchased from Sigma (USA). Axes: X – time, min; Y – detector signal, relative intensity, %.

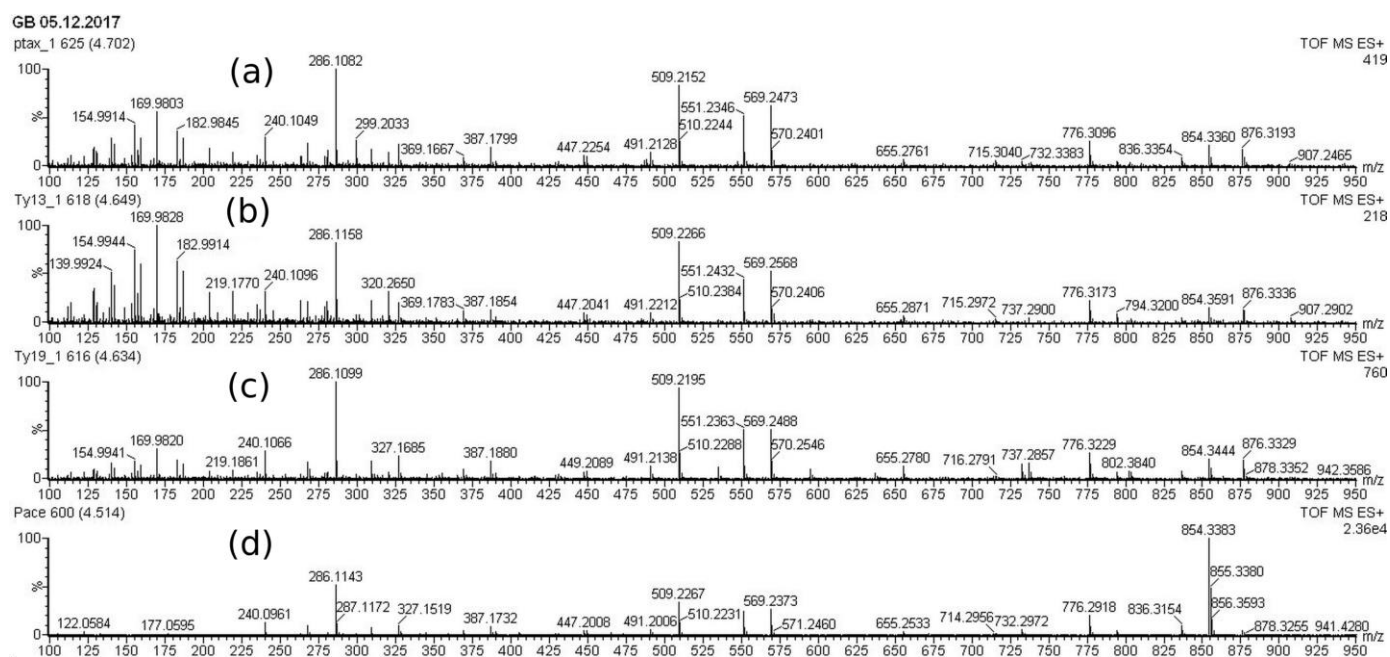

**Fig S2.** MS spectra (positive ions) of the peaks corresponding to paclitaxel on UPLC-ESI-MS chromatograms of methanolic extracts from biomass of *Taxus wallichiana* suspension cell culture and solutions of standard samples of paclitaxel in Fig. S1: **(a)** – sample of paclitaxel isolated from the bark of *T. cuspidata*; **(b)** – methanolic extract from biomass of *T. wallichiana* «young» suspension cell culture, flasks, 28 days, control without elicitation; **(c)** – methanolic extract from biomass of *T. wallichiana* «young» suspension cell culture, flasks, day 28, 7 days after MeJ elicitation (final concentration 100  $\mu$ M); **(d)** – paclitaxel standard sample purchased from Sigma (USA). Axes: X – m/z; Y – detector signal, relative intensity, %.

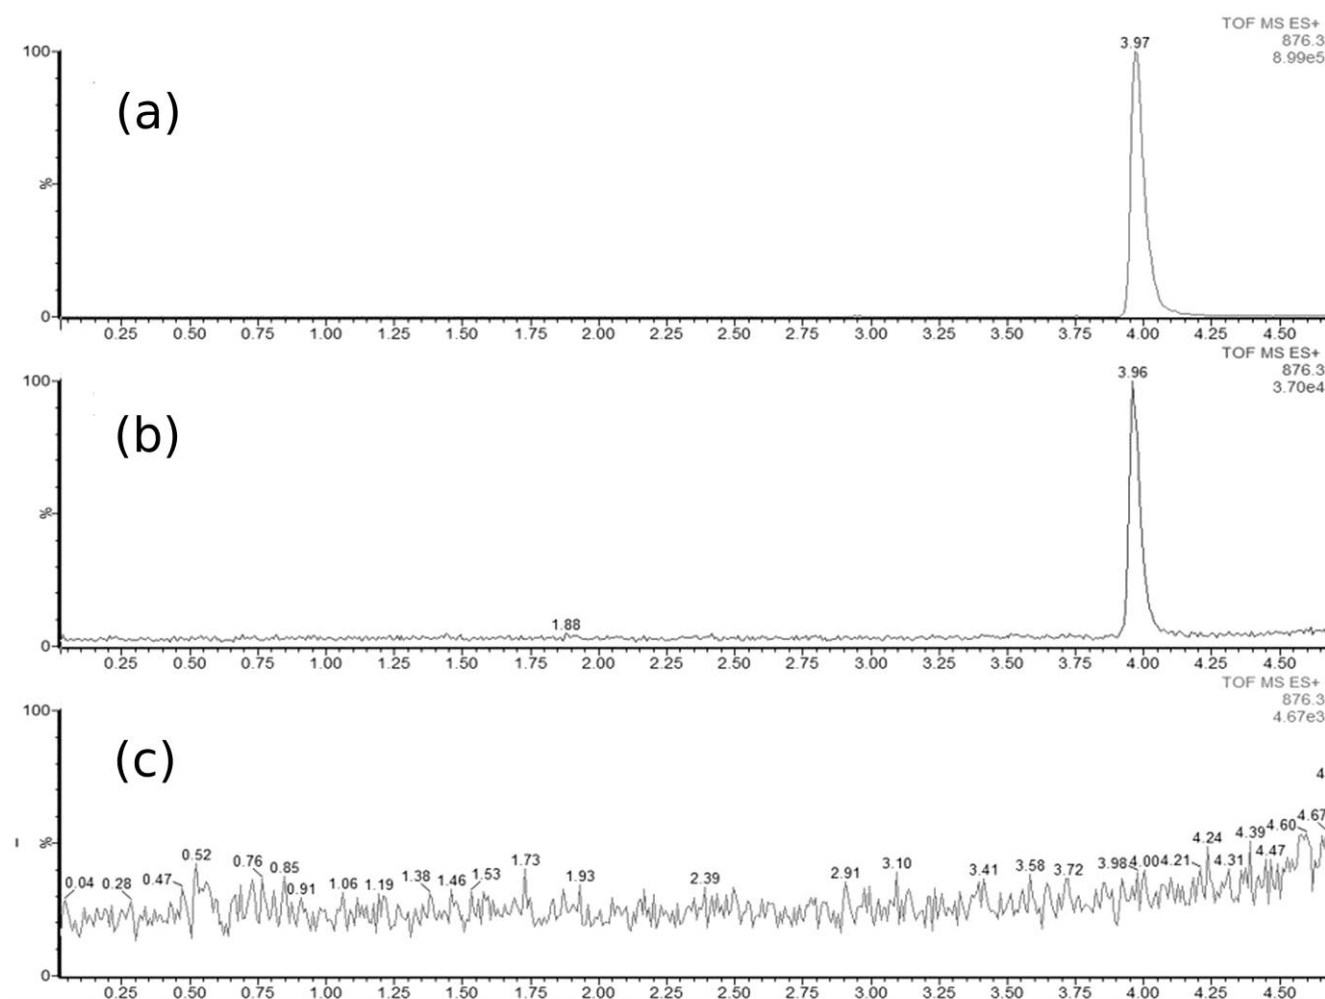

**Fig. S3.** UPLC-ESI-MS chromatograms (extracted ion chromatograms for  $m/z$  876.3 corresponding to  $[M+Na]^+$  for paclitaxel) of methanolic extracts from biomass of *Taxus wallichiana* «old» cell suspension culture and solution of paclitaxel standard sample: **(a)** – paclitaxel standard sample purchased from Sigma (USA); **(b)** – methanolic extract from biomass of *T. wallichiana* suspension cell culture, flasks, day 28, 7 days after MeJ elicitation (final concentration 100  $\mu$ M); **(c)** – methanolic extract from biomass of *T. wallichiana* cell suspension culture, flasks, day 28, control without elicitation. Axes: X – time, min; Y – detector signal, relative intensity, %.
